# Supplementary material
Source: Atypon-hosted journal article supplement (doi:10.1287/ijoc.2024.1086)
Supplement: ijoc.2024.1086.sm1.pdf [file ijoc.2024.1086.sm1.pdf]

# Online Appendix of “Entropic-based robust vehicle rental revenue management with substitution and repositioning”

## A. Proof of results

For simplification, before providing any further proof, we make the following clarification.

1. To facilitate the forthcoming derivation, we first define the following notations:  $\hat{h}_{ijd}^{t-1, \tau-1} = \prod_{s=0}^{t-2 \wedge \tau-1} (1 - h_{ijd}^{t-1-s, \tau-1-s})$  and  $\check{h}_{ijd}^{t-1, \tau-1} = h_{ijd}^{t-1, \tau-1} \prod_{s=1}^{t-2 \wedge \tau-1} (1 - h_{ijd}^{t-1-s, \tau-1-s})$ .  $\hat{q}_l^{t-1, \tau-1, s} = \prod_{\bar{\tau}=0}^{t-2 \wedge \tau-1} (1 - q_l^{\tau+s-1-\bar{\tau}} - a_l^{\tau+s-1-\bar{\tau}})$  and  $\check{q}_l^{t, \tau, s} = q_l^{\tau+s} \prod_{\bar{\tau}=1}^{t-1 \wedge \tau} (1 - q_l^{\tau+s-\bar{\tau}} - a_l^{\tau+s-\bar{\tau}})$ .
2. Since  $\bar{S}$  is the maximum lead time of customers, the state variable  $\tilde{\zeta}_{ijd}^{t, \tau}(l, s) = 0$  when  $\tau + s > \bar{S}$  so that Equation (4c) can be rewritten as  $\tilde{y}_{ijd}^{t, 0}(\tilde{\zeta}, l, s) = \sum_{\tau \in [0, \bar{S}]} \text{Bin}(\tilde{\zeta}_{ijd}^{t, \tau}(l, s), q_l^{\tau+s})$ .
3. In (2b), when substitution occurs, the probability of pickup and cancellation is not affected. Since  $r_{ijl}^{t, \tau} = \bar{r}_{ijl}^{t, s, \tau}$ ,  $\forall l \in [D], i, j \in [I], t \in [T], s \in [0, \bar{S}], \tau \in [0, S]$ , the term  $d \neq l$  can be removed from all the relevant equations (*i.e.*, (1b), (4a), (7c)) without loss of generality.

*Proof of Proposition 1.*

$$\begin{aligned} \mathbb{G}_\theta \left( \text{Bin} \left( \lfloor b\tilde{\xi} \rfloor, q \right) \right) &= \theta \log \mathbb{E}_{\mathbb{P}} \left[ \exp \left( \text{Bin} \left( \lfloor b\tilde{\xi} \rfloor, q \right) / \theta \right) \right] = \theta \log \mathbb{E}_\xi \left[ \mathbb{E}_{\mathbb{P}} \left[ \exp \left( \text{Bin} \left( \lfloor b\tilde{\xi} \rfloor, q \right) / \theta \right) \middle| \tilde{\xi} \right] \right] \\ &= \theta \log \mathbb{E}_\xi \left[ \left\lfloor b\tilde{\xi} \right\rfloor \delta(q) / \theta \right] = \mathbb{G}_\theta \left( \left\lfloor b\tilde{\xi} \right\rfloor \delta(q) \right) \end{aligned}$$

where  $\delta(q) = \theta \log(1 - q + q \exp(1/\theta))$ . The first equation is derived by the conditional expectation, while the second incorporates the moment-generating function of the binomial distribution.  $\square$

*Proof of Proposition 2.* Based on Proposition 1, we have  $\mathbb{G}_\theta \left( \text{Bin} \left( \lfloor b\tilde{\xi} \rfloor, q \right) \right) = \mathbb{G}_\theta \left( \left\lfloor b\tilde{\xi} \right\rfloor \delta(q) \right)$ , where  $\delta(q) = \theta \log(1 - q + q \exp(1/\theta))$ . Since  $q \in [0, 1]$ , we have  $\delta(q) \in [0, 1]$ .

Similarly, we have  $\mathbb{G}_\theta \left( \text{Bin} \left( b\tilde{\xi}, q \right) \right) = \mathbb{G}_\theta \left( b\tilde{\xi} \delta(q) \right)$ . Since  $\mathbb{G}_\theta(\cdot)$  is a monotonically increasing function and  $\delta(q) \geq 0$ , we have  $\left\lfloor b\tilde{\xi} \right\rfloor \delta(q) \leq b\tilde{\xi} \delta(q)$ , and thus

$$\mathbb{G}_\theta \left( \text{Bin} \left( \left\lfloor b\tilde{\xi} \right\rfloor, q \right) \right) = \mathbb{G}_\theta \left( \left\lfloor b\tilde{\xi} \right\rfloor \delta(q) \right) \leq \mathbb{G}_\theta \left( \text{Bin} \left( b\tilde{\xi}, q \right) \right) = \mathbb{G}_\theta \left( b\tilde{\xi} \delta(q) \right)$$

Because of the monotonicity of  $\mathbb{G}_\theta(\cdot)$ , we have

$$\mathbb{G}_\theta \left( b\tilde{\xi} \delta(q) \right) - \mathbb{G}_\theta \left( \left\lfloor b\tilde{\xi} \right\rfloor \delta(q) \right) = \mathbb{G}_\theta \left( b\tilde{\xi} \delta(q) \right) - \mathbb{G}_\theta \left( b\tilde{\xi} \delta(q) - \delta(q) \right) = \delta(q) \leq 1 \quad \square$$

*Proof of Proposition 3.*

$$\begin{aligned} \mathbb{G}_\theta \left( \sum_{d \in [D]} \tilde{z}_{id}^t - B_i \right) &= \sum_{j \in [I] \setminus \{i\}} \mathbb{G}_\theta \left( - \sum_{d \in [D]} \sum_{\bar{t} \in [t-1]} \left( \tilde{y}_{ijd}^{\bar{t}, 0}(\tilde{\xi}) + \sum_{l \in [D]} \sum_{s \in [0, \bar{S}]} \tilde{y}_{ijd}^{\bar{t}, 0}(\tilde{\zeta}, l, s) + \sum_{s \in [0, \bar{S}]} \tilde{x}_{ijd}^{\bar{t}, s} \tilde{\xi}_{ijd}^{\bar{t}, s} \right) \right) \\ &+ \sum_{j \in [I] \setminus \{i\}} \mathbb{G}_\theta \left( \sum_{d \in [D]} \sum_{\bar{t} \in [t-1]} \left( \sum_{s \in [0, \bar{S}]} \tilde{x}_{jid}^{\bar{t}, s} \tilde{\xi}_{jid}^{\bar{t}, s} + \sum_{l \in [D]} \sum_{s \in [0, \bar{S}]} \sum_{\bar{\tau} \in [0, \bar{t}-1]} \text{Bin} \left( \tilde{y}_{jid}^{\bar{t}-\bar{\tau}, 0}(\tilde{\zeta}, l, s), \tilde{h}_{jil}^{\bar{t}, \bar{\tau}} \right) \right) \right) \end{aligned}$$

$$\begin{aligned}
& + \sum_{\bar{s} \in [0, \bar{t}-1]} \text{Bin} \left( \tilde{y}_{jid}^{\bar{t}-\bar{s}, 0}(\tilde{\xi}), \check{h}_{jid}^{\bar{t}, \bar{s}} \right) \Big) + \sum_{d \in [D]} z_{id}^1 + \sum_{d \in [D]} \sum_{\bar{t} \in [t-1]} \sum_{j \in [I]} \left( x_{jid}^{0, \bar{t}} - x_{ijd}^{0, \bar{t}} \right) - B_i \\
& + \mathbb{G}_\theta \left( \sum_{d \in [D]} \sum_{\bar{t} \in [t-1]} \left( \sum_{l \in [D]} \sum_{s \in [0, \bar{S}]} \sum_{\bar{\tau} \in [0, \bar{t}-1]} \text{Bin} \left( \tilde{y}_{iid}^{\bar{t}-\bar{\tau}, 0}(\tilde{\zeta}, l, s), \check{h}_{iil}^{\bar{t}, \bar{\tau}} \right) + \sum_{\bar{s} \in [0, \bar{t}-1]} \text{Bin} \left( \tilde{y}_{iid}^{\bar{t}-\bar{s}, 0}(\tilde{\xi}), \check{h}_{iid}^{\bar{t}, \bar{s}} \right) \right. \right. \\
& \quad \left. \left. - \tilde{y}_{iid}^{\bar{t}, 0}(\tilde{\xi}) - \sum_{l \in [D]} \sum_{s \in [0, \bar{S}]} \tilde{y}_{iid}^{\bar{t}, 0}(\tilde{\zeta}, l, s) \right) \right) + \sum_{d \in [D]} \sum_{l \in [D]} \sum_{j \in [I]} \sum_{s \in [0, \bar{S}]} \mathbb{G}_\theta \left( \sum_{\bar{t} \in [t-1]} \sum_{\bar{\tau} \in [\bar{t}, \bar{S}]} \text{Bin} \left( y_{jid}^{1, \bar{\tau}-\bar{t}+1}(\tilde{\zeta}, l, s), \check{h}_{jil}^{\bar{t}, \bar{\tau}} \right) \right) \\
& + \sum_{d \in [D]} \sum_{j \in [I]} \mathbb{G}_\theta \left( \sum_{\bar{t} \in [t-1]} \sum_{\bar{s} \in [\bar{t}, \bar{S}]} \text{Bin} \left( y_{jid}^{1, \bar{s}-\bar{t}+1}(\tilde{\xi}), \check{h}_{jid}^{\bar{t}, \bar{s}} \right) \right) \tag{14}
\end{aligned}$$

The last two terms in Equation (14) are independent on the order demand over the decision periods. Hence, we have  $\mathbb{G}_\theta \left( \sum_{\bar{t} \in [t-1]} \sum_{\bar{\tau} \in [\bar{t}, \bar{S}]} \text{Bin} \left( y_{jid}^{1, \bar{\tau}-\bar{t}+1}(\tilde{\zeta}, l, s), \check{h}_{jil}^{\bar{t}, \bar{\tau}} \right) \right) = \sum_{\bar{t} \in [S]} y_{jid}^{1, \bar{t}}(\tilde{\zeta}, l, s) \check{\Upsilon}_{jil}^{\bar{t}, \bar{t}}(1)$ , where  $\check{\Upsilon}_{jid}^{\bar{t}, \bar{t}}(x) = \theta \log \left( 1 + \sum_{\bar{\tau} \in [(t-1) \wedge (S-\bar{t}+1)]} \check{h}_{jid}^{\bar{\tau}, \bar{t}+\bar{\tau}-1} \left( \exp \left( \frac{x}{\theta} \right) - 1 \right) \right)$ , and similarly, we have  $\mathbb{G}_\theta \left( \sum_{\bar{t} \in [t-1]} \sum_{\bar{s} \in [\bar{t}, \bar{S}]} \text{Bin} \left( y_{jid}^{1, \bar{s}-\bar{t}+1}(\tilde{\xi}), \check{h}_{jid}^{\bar{t}, \bar{s}} \right) \right) = \sum_{\bar{t} \in [S]} y_{jid}^{1, \bar{t}}(\tilde{\xi}) \check{\Upsilon}_{jid}^{\bar{t}, \bar{t}}(1)$ . The first term in Equation (14) can be reformulated as follows:

$$\begin{aligned}
& \mathbb{G}_\theta \left( - \sum_{d \in [D]} \sum_{\bar{t} \in [t-1]} \left( \tilde{y}_{ijd}^{\bar{t}, 0}(\tilde{\xi}) + \sum_{l \in [D]} \sum_{s \in [0, \bar{S}]} \tilde{y}_{ijd}^{\bar{t}, 0}(\tilde{\zeta}, l, s) + \sum_{s \in [0, \bar{S}]} \bar{x}_{ijd}^{\bar{t}, s} \tilde{\xi}_{ijd}^{\bar{t}, s} \right) \right) \\
& = \sum_{l \in [D]} \sum_{\bar{t} \in [t-1]} \mathbb{G}_\theta \left( - \sum_{s \in [0, \bar{t}-1]} \left( \text{Bin} \left( \tilde{\xi}_{ijl}^{t-\bar{t}+s, s} \alpha_{ijl}^{t-\bar{t}+s+1, s+1} / \alpha_{ijl}^{t-\bar{t}+s, s}, q_l^s \right) \right. \right. \\
& \quad \left. \left. + \sum_{d \in [D]} \sum_{\tau \in [0, \bar{t}-s-1]} \text{Bin} \left( \tilde{\xi}_{ijl}^{t-\bar{t}+s, s} \gamma_{ijld}^{t-\bar{t}+s, s} / \alpha_{ijl}^{t-\bar{t}+s, s}, \bar{q}_l^{t-\bar{t}+s+\tau, \tau, s} \right) + \bar{x}_{ijl}^{t-\bar{t}+s, s} \tilde{\xi}_{ijl}^{t-\bar{t}+s, s} \right) \right) \tag{15a}
\end{aligned}$$

$$\begin{aligned}
& + \sum_{l \in [D]} \sum_{\bar{t} \in [t, \bar{S}+1]} \mathbb{G}_\theta \left( - \sum_{s \in [\bar{t}-t+1, \bar{t}-1]} \left( \text{Bin} \left( \tilde{\xi}_{ijl}^{t-\bar{t}+s, s} \alpha_{ijl}^{t-\bar{t}+s+1, s+1} / \alpha_{ijl}^{t-\bar{t}+s, s}, q_l^s \right) \right. \right. \\
& \quad \left. \left. + \sum_{d \in [D]} \sum_{\tau \in [0, \bar{t}-s-1]} \text{Bin} \left( \tilde{\xi}_{ijl}^{t-\bar{t}+s, s} \gamma_{ijld}^{t-\bar{t}+s, s} / \alpha_{ijl}^{t-\bar{t}+s, s}, \bar{q}_l^{t-\bar{t}+s+\tau, \tau, s} \right) + \bar{x}_{ijl}^{t-\bar{t}+s, s} \tilde{\xi}_{ijl}^{t-\bar{t}+s, s} \right) \right) \tag{15b}
\end{aligned}$$

$$\begin{aligned}
& + \sum_{l \in [D]} \sum_{\bar{t} \in [\bar{S}+2, t+\bar{S}-1]} \mathbb{G}_\theta \left( - \sum_{s \in [\bar{t}-t+1, \bar{S}]} \left( \text{Bin} \left( \tilde{\xi}_{ijl}^{t-\bar{t}+s, s} \alpha_{ijl}^{t-\bar{t}+s+1, s+1} / \alpha_{ijl}^{t-\bar{t}+s, s}, q_l^s \right) \right. \right. \\
& \quad \left. \left. + \sum_{d \in [D]} \sum_{\tau \in [0, \bar{t}-s-1]} \text{Bin} \left( \tilde{\xi}_{ijl}^{t-\bar{t}+s, s} \gamma_{ijld}^{t-\bar{t}+s, s} / \alpha_{ijl}^{t-\bar{t}+s, s}, \bar{q}_l^{t-\bar{t}+s+\tau, \tau, s} \right) + \bar{x}_{ijl}^{t-\bar{t}+s, s} \tilde{\xi}_{ijl}^{t-\bar{t}+s, s} \right) \right) \tag{15c}
\end{aligned}$$

$$\begin{aligned}
& + \sum_{d, l \in [D]} \sum_{s \in [0, \bar{S}]} \sum_{\bar{t} \in [\bar{S}]} \mathbb{G}_\theta \left( - \sum_{\tau \in [(t-1) \wedge (\bar{S}-\bar{t}+1)]} \text{Bin} \left( \zeta_{ijd}^{1, \bar{t}}(l, s), \bar{q}_l^{\tau, \bar{t}+\tau-1, s} \right) \right) \tag{15d}
\end{aligned}$$

where Equation (15d) =  $\sum_{d, l \in [D]} \sum_{s \in [0, \bar{S}]} \sum_{\bar{t} \in [\bar{S}]} \zeta_{ijd}^{1, \bar{t}}(l, s) \Upsilon_l^{\bar{t}, \bar{t}, s}(x)$ ,  $\Upsilon_l^{\bar{t}, \bar{t}, s}(x) = \theta \log \left( 1 + \sum_{\tau \in [(t-1) \wedge (\bar{S}-\bar{t}+1)]} \bar{q}_l^{\tau, \bar{t}+\tau-1, s} \left( \exp \left( \frac{x}{\theta} \right) - 1 \right) \right)$ . Equation (15a) can be reformulated as follows:

$$\sum_{l \in [D]} \sum_{\bar{t} \in [t-1]} \theta \log \mathbb{E}_{\mathbb{P}} \left[ \exp \left( \frac{1}{\theta} \left( - \sum_{s \in [0, \bar{t}-1]} \left( \text{Bin} \left( \tilde{\xi}_{ijl}^{t-\bar{t}+s, s} \alpha_{ijl}^{t-\bar{t}+s+1, s+1} / \alpha_{ijl}^{t-\bar{t}+s, s}, q_l^s \right) \right) \right) \right) \right]$$

$$\begin{aligned}
& + \sum_{d \in [D]} \sum_{\tau \in [0, \bar{t}-s-1]} \text{Bin} \left( \tilde{\xi}_{ijl}^{t-\bar{t}+s,s} \gamma_{ijld}^{t-\bar{t}+s,s} / \alpha_{ijl}^{t-\bar{t}+s,s}, \check{q}_l^{t-\bar{t}+s+\tau,\tau,s} \right) + \bar{x}_{ijl}^{t-\bar{t}+s,s} \tilde{\xi}_{ijl}^{t-\bar{t}+s,s} \Big) \Big) \Big) \Big] \\
= & \sum_{l \in [D]} \sum_{\bar{t} \in [t-1]} \theta \log \mathbb{E}_\xi \mathbb{E}_P \left[ \exp \left( \frac{1}{\theta} \left( - \sum_{s \in [0, \bar{t}-1]} \left( \text{Bin} \left( \tilde{\xi}_{ijl}^{t-\bar{t}+s,s} \alpha_{ijl}^{t-\bar{t}+s+1,s+1} / \alpha_{ijl}^{t-\bar{t}+s,s}, q_l^s \right) \right. \right. \right. \right. \\
& \left. \left. \left. + \sum_{d \in [D]} \sum_{\tau \in [0, \bar{t}-s-1]} \text{Bin} \left( \tilde{\xi}_{ijl}^{t-\bar{t}+s,s} \gamma_{ijld}^{t-\bar{t}+s,s} / \alpha_{ijl}^{t-\bar{t}+s,s}, \check{q}_l^{t-\bar{t}+s+\tau,\tau,s} \right) + \bar{x}_{ijl}^{t-\bar{t}+s,s} \tilde{\xi}_{ijl}^{t-\bar{t}+s,s} \right) \right) \right) \Big| \tilde{\xi}_{ijl}^{t-1, \bar{t}-1} \right] \\
= & \left\{ \begin{array}{l} \sum_{l \in [D]} \sum_{\bar{t} \in [t-1]} \theta \log \mathbb{E}_\xi \left[ \mathbb{E}_P \left[ \exp \left( \frac{1}{\theta} \left( - \sum_{s \in [0, \bar{t}-2]} \left( \text{Bin} \left( \tilde{\xi}_{ijl}^{t-\bar{t}+s,s} \alpha_{ijl}^{t-\bar{t}+s+1,s+1} / \alpha_{ijl}^{t-\bar{t}+s,s}, q_l^s \right) + \sum_{d \in [D]} \right. \right. \right. \right. \right. \\ \left. \left. \left. \sum_{\tau \in [0, \bar{t}-s-1]} \text{Bin} \left( \tilde{\xi}_{ijl}^{t-\bar{t}+s,s} \gamma_{ijld}^{t-\bar{t}+s,s} / \alpha_{ijl}^{t-\bar{t}+s,s}, \check{q}_l^{t-\bar{t}+s+\tau,\tau,s} \right) + \bar{x}_{ijl}^{t-\bar{t}+s,s} \tilde{\xi}_{ijl}^{t-\bar{t}+s,s} \right) \right) + \tilde{\xi}_{ijl}^{t-1, \bar{t}-1} \frac{\phi_{ijl}^{t, \bar{t}, \bar{t}-1}}{\theta \alpha_{ijl}^{t-1, \bar{t}-1}} \right) \right] \right] \\ \phi_{ijl}^{t, \bar{t}, \bar{t}-1} \geq \alpha_{ijl}^{t, \bar{t}} \rho_l^{\bar{t}-1} (-1, 0) + \sum_{d \in [D]} \gamma_{ijld}^{t-1, \bar{t}-1} \check{\rho}_l^{t, \bar{t}, \bar{t}-1} (-1) - x_{ijl}^{1, t-1, \bar{t}-1}, \quad \forall l \in [D], \bar{t} \in [t-1] \end{array} \right. \\
= & \left\{ \begin{array}{l} \sum_{l \in [D]} \sum_{\bar{t} \in [t-1]} \mathbb{G}_\theta \left[ \frac{\tilde{\xi}_{ijl}^{t-\bar{t}, 0} \phi_{ijl}^{t, \bar{t}, 0}}{\alpha_{ijl}^{t-\bar{t}, 0}} \right] \\ \phi_{ijl}^{t, \bar{t}, \bar{t}-1} \geq \alpha_{ijl}^{t, \bar{t}} \rho_l^{\bar{t}-1} (-1, 0) + \sum_{d \in [D]} \gamma_{ijld}^{t-1, \bar{t}-1} \check{\rho}_l^{t, \bar{t}, \bar{t}-1} (-1) - x_{ijl}^{1, t-1, \bar{t}-1} \quad \forall l \in [D], \bar{t} \in [t-1] \\ \phi_{ijl}^{t, \bar{t}, s} \geq \alpha_{ijl}^{t-\bar{t}+s+1, s+1} \rho_l^s \left( -1, \frac{\phi_{ijl}^{t, \bar{t}, s+1}}{\alpha_{ijl}^{t-\bar{t}+s+1, s+1}} \right) + \sum_{d \in [D]} \gamma_{ijld}^{t-\bar{t}+s, s} \check{\rho}_l^{t, \bar{t}, s} (-1) - x_{ijl}^{1, t-\bar{t}+s, s} \\ \forall l \in [D], t \neq 2, \bar{t} \in [2, t-1], s \in [0, \bar{t}-2] \end{array} \right.
\end{aligned}$$

where  $\rho_l^s(x, z) = \theta \log(1 + q_l^s(\exp(\frac{x}{\theta}) - 1) + (1 - q_l^s - a_l^s)(\exp(\frac{z}{\theta}) - 1))$  and  $\check{\rho}_l^{t, \bar{t}, s}(x) = \theta \log\left(1 + \sum_{\tau \in [0, \bar{t}-s-1]} \check{q}_l^{t-\bar{t}+s+\tau, \tau, s}(\exp(\frac{x}{\theta}) - 1)\right)$ . Similarly, since  $\alpha_{ijl}^{1, \bar{t}-t+1} = \xi_{ijl}^{1, \bar{t}-t+1}$ , Equations (15b) and (15c) have the equivalent reformulations:

$$\begin{aligned}
& \sum_{l \in [D]} \sum_{\bar{t} \in [t, \bar{S}+1]} \xi_{ijl}^{1, \bar{t}-t+1} \frac{\phi_{ijl}^{t, \bar{t}, \bar{t}-t+1}}{\alpha_{ijl}^{1, \bar{t}-t+1}} = \sum_{l \in [D]} \sum_{\bar{t} \in [t, \bar{S}+1]} \phi_{ijl}^{t, \bar{t}, \bar{t}-t+1} \\
& \phi_{ijl}^{t, \bar{t}, \bar{t}-1} \geq \alpha_{ijl}^{t, \bar{t}} \rho_l^{\bar{t}-1} (-1, 0) + \sum_{d \in [D]} \gamma_{ijld}^{t-1, \bar{t}-1} \check{\rho}_l^{t, \bar{t}, \bar{t}-1} (-1) - x_{ijl}^{1, t-1, \bar{t}-1} \quad \forall l \in [D], \bar{t} \in [t, \bar{S}+1] \\
& \phi_{ijl}^{t, \bar{t}, s} \geq \alpha_{ijl}^{t-\bar{t}+s+1, s+1} \rho_l^s \left( -1, \frac{\phi_{ijl}^{t, \bar{t}, s+1}}{\alpha_{ijl}^{t-\bar{t}+s+1, s+1}} \right) + \sum_{d \in [D]} \gamma_{ijld}^{t-\bar{t}+s, s} \check{\rho}_l^{t, \bar{t}, s} (-1) - x_{ijl}^{1, t-\bar{t}+s, s} \\
& \quad \forall l \in [D], t \neq 2, \bar{t} \in [t, \bar{S}+1], s \in [\bar{t}-t+1, \bar{t}-2] \\
& \sum_{l \in [D]} \sum_{\bar{t} \in [\bar{S}+2, t+\bar{S}-1]} \xi_{ijl}^{1, \bar{t}-t+1} \frac{\phi_{ijl}^{t, \bar{t}, \bar{t}-t+1}}{\alpha_{ijl}^{1, \bar{t}-t+1}} = \sum_{l \in [D]} \sum_{\bar{t} \in [\bar{S}+2, t+\bar{S}-1]} \phi_{ijl}^{t, \bar{t}, \bar{t}-t+1} \\
& \phi_{ijl}^{t, \bar{t}, \bar{S}} \geq \alpha_{ijl}^{t-\bar{t}+\bar{S}+1, \bar{S}+1} \rho_l^{\bar{S}} (-1, 0) + \sum_{d \in [D]} \gamma_{ijld}^{t-\bar{t}+\bar{S}, \bar{S}} \check{\rho}_l^{t, \bar{t}, \bar{S}} (-1) - x_{ijl}^{1, t-\bar{t}+\bar{S}, \bar{S}} \quad \forall l \in [D], \bar{t} \in [\bar{S}+2, t+\bar{S}-1] \\
& \phi_{ijl}^{t, \bar{t}, s} \geq \alpha_{ijl}^{t-\bar{t}+s+1, s+1} \rho_l^s \left( -1, \frac{\phi_{ijl}^{t, \bar{t}, s+1}}{\alpha_{ijl}^{t-\bar{t}+s+1, s+1}} \right) + \sum_{d \in [D]} \gamma_{ijld}^{t-\bar{t}+s, s} \check{\rho}_l^{t, \bar{t}, s} (-1) - x_{ijl}^{1, t-\bar{t}+s, s}
\end{aligned}$$

$$\forall l \in [D], t \neq 2, \bar{t} \in [\bar{S} + 2, t + \bar{S} - 2], s \in [\bar{t} - t + 1, \bar{S} - 1]$$

Then for the second term in Equation (14), we can reformulate it as follows:

$$\begin{aligned} & \mathbb{G}_\theta \left( \sum_{d \in [D]} \sum_{\bar{t} \in [t-1]} \left( \sum_{s \in [0, \bar{S}]} \bar{x}_{jid}^{\bar{t}, s} \tilde{\zeta}_{jid}^{\bar{t}, s} + \sum_{l \in [D]} \sum_{s \in [0, \bar{S}]} \sum_{\bar{\tau} \in [0, \bar{t}-1]} \text{Bin} \left( \tilde{y}_{jid}^{\bar{t}-\bar{\tau}, 0}(\tilde{\zeta}, l, s), \check{h}_{jid}^{\bar{t}, \bar{\tau}} \right) + \sum_{\bar{s} \in [0, \bar{t}-1]} \text{Bin} \left( \tilde{y}_{jid}^{\bar{t}-\bar{s}, 0}(\tilde{\xi}), \check{h}_{jid}^{\bar{t}, \bar{s}} \right) \right) \right) \\ &= \sum_{l \in [D]} \sum_{\bar{t} \in [t-1]} \mathbb{G}_\theta \left( \sum_{s \in [0, \bar{t}-1]} \left( \bar{x}_{jid}^{t-\bar{t}+s, s} \tilde{\zeta}_{jid}^{t-\bar{t}+s, s} + \sum_{\bar{s} \in [0, \bar{t}-s-1]} \text{Bin} \left( \tilde{\zeta}_{jid}^{t-\bar{t}+s, s} \alpha_{jid}^{t-\bar{t}+s+1, s+1} / \alpha_{jid}^{t-\bar{t}+s, s}, q_l^s \check{h}_{jid}^{t-\bar{t}+s+\bar{s}, \bar{s}} \right) \right) \right. \\ & \quad \left. + \sum_{d \in [D]} \sum_{\bar{\tau} \in [0, \bar{t}-s-1]} \sum_{\tau \in [0, \bar{t}-s-\bar{\tau}-1]} \text{Bin} \left( \tilde{\xi}_{jid}^{t-\bar{t}+s, s} \gamma_{jild}^{t-\bar{t}+s, s} / \alpha_{jid}^{t-\bar{t}+s, s}, \check{q}_l^{t-\bar{t}+s+\bar{\tau}, \bar{\tau}, s} \check{h}_{jid}^{t-\bar{t}+s+\bar{\tau}+\tau, \tau} \right) \right) \quad (16a) \\ & \quad + \sum_{l \in [D]} \sum_{\bar{t} \in [t, \bar{S}+1]} \mathbb{G}_\theta \left( \sum_{s \in [\bar{t}-t+1, \bar{t}-1]} \left( \bar{x}_{jid}^{t-\bar{t}+s, s} \tilde{\zeta}_{jid}^{t-\bar{t}+s, s} + \sum_{\bar{s} \in [0, \bar{t}-s-1]} \text{Bin} \left( \tilde{\zeta}_{jid}^{t-\bar{t}+s, s} \alpha_{jid}^{t-\bar{t}+s+1, s+1} / \alpha_{jid}^{t-\bar{t}+s, s}, q_l^s \check{h}_{jid}^{t-\bar{t}+s+\bar{s}, \bar{s}} \right) \right) \right. \\ & \quad \left. + \sum_{d \in [D]} \sum_{\bar{\tau} \in [0, \bar{t}-s-1]} \sum_{\tau \in [0, \bar{t}-s-\bar{\tau}-1]} \text{Bin} \left( \tilde{\xi}_{jid}^{t-\bar{t}+s, s} \gamma_{jild}^{t-\bar{t}+s, s} / \alpha_{jid}^{t-\bar{t}+s, s}, \check{q}_l^{t-\bar{t}+s+\bar{\tau}, \bar{\tau}, s} \check{h}_{jid}^{t-\bar{t}+s+\bar{\tau}+\tau, \tau} \right) \right) \quad (16b) \\ & \quad + \sum_{l \in [D]} \sum_{\bar{t} \in [\bar{S}+2, t+\bar{S}-1]} \mathbb{G}_\theta \left( \sum_{s \in [\bar{t}-t+1, \bar{S}]} \left( \bar{x}_{jid}^{t-\bar{t}+s, s} \tilde{\zeta}_{jid}^{t-\bar{t}+s, s} + \sum_{\bar{s} \in [0, \bar{t}-s-1]} \text{Bin} \left( \tilde{\zeta}_{jid}^{t-\bar{t}+s, s} \alpha_{jid}^{t-\bar{t}+s+1, s+1} / \alpha_{jid}^{t-\bar{t}+s, s}, q_l^s \check{h}_{jid}^{t-\bar{t}+s+\bar{s}, \bar{s}} \right) \right) \right. \\ & \quad \left. + \sum_{d \in [D]} \sum_{\bar{\tau} \in [0, \bar{t}-s-1]} \sum_{\tau \in [0, \bar{t}-s-\bar{\tau}-1]} \text{Bin} \left( \tilde{\xi}_{jid}^{t-\bar{t}+s, s} \gamma_{jild}^{t-\bar{t}+s, s} / \alpha_{jid}^{t-\bar{t}+s, s}, \check{q}_l^{t-\bar{t}+s+\bar{\tau}, \bar{\tau}, s} \check{h}_{jid}^{t-\bar{t}+s+\bar{\tau}+\tau, \tau} \right) \right) \quad (16c) \\ & \quad + \sum_{d \in [D]} \sum_{l \in [D]} \sum_{s \in [0, \bar{S}]} \sum_{\bar{t} \in [\bar{S}]} \mathbb{G}_\theta \left( \sum_{\bar{\tau} \in [(\bar{S}-\bar{t}+1) \wedge (t-1)]} \sum_{\tau \in [0, t-\bar{\tau}-1]} \text{Bin} \left( \tilde{\zeta}_{jid}^{1, \bar{t}}(l, s), \check{q}_l^{\bar{\tau}, \bar{t}+\bar{\tau}-1, s} \check{h}_{jid}^{\bar{\tau}+\tau, \tau} \right) \right) \quad (16d) \end{aligned}$$

Similarly, Equation (16d) =  $\sum_{d, l \in [D]} \sum_{s \in [0, \bar{S}]} \sum_{\bar{t} \in [\bar{S}]} \zeta_{jid}^{1, \bar{t}}(l, s) \tilde{\Upsilon}_{jid}^{t, \bar{t}, s}(1)$  where  $\tilde{\Upsilon}_{jid}^{t, \bar{t}, s}(x) = \theta \log \left( 1 + \sum_{\bar{\tau} \in [(\bar{S}-\bar{t}+1) \wedge (t-1)]} \sum_{\tau \in [0, t-\bar{\tau}-1]} \check{q}_l^{\bar{\tau}, \bar{t}+\bar{\tau}-1, s} \check{h}_{jid}^{\bar{\tau}+\tau, \tau} \left( \exp \left( \frac{x}{\theta} \right) - 1 \right) \right)$ . Then Equation (16a), (16b), and (16c) can be reformulated as

$$\begin{aligned} & \sum_{l \in [D]} \sum_{\bar{t} \in [t-1]} \mathbb{G}_\theta \left( \tilde{\zeta}_{jid}^{t-\bar{t}, 0} \frac{\psi_{jid}^{t, \bar{t}, 0}}{\alpha_{jid}^{t-\bar{t}, 0}} \right) \\ & \psi_{jid}^{t, \bar{t}, \bar{t}-1} \geq \alpha_{jid}^{t, \bar{t}} \pi_{jid}^{t, \bar{t}, \bar{t}-1}(1, 0) + \sum_{d \in [D]} \gamma_{jild}^{t-1, \bar{t}-1} \check{\pi}_{jid}^{t, \bar{t}, \bar{t}-1}(1) + x_{jid}^{1, t-1, \bar{t}-1} \quad \forall l \in [D], \bar{t} \in [t-1] \\ & \psi_{jid}^{t, \bar{t}, s} \geq \alpha_{jid}^{t-\bar{t}+s+1, s+1} \pi_{jid}^{t, \bar{t}, s} \left( 1, \frac{\psi_{jid}^{t, \bar{t}, s+1}}{\alpha_{jid}^{t-\bar{t}+s+1, s+1}} \right) + \sum_{d \in [D]} \gamma_{jild}^{t-\bar{t}+s, s} \check{\pi}_{jid}^{t, \bar{t}, s}(1) + x_{jid}^{1, t-\bar{t}+s, s} \quad \forall l \in [D], t \neq 2, \bar{t} \in [2, t-1], s \in [0, \bar{t}-2] \\ & \sum_{l \in [D]} \sum_{\bar{t} \in [t, \bar{S}+1]} \xi_{jid}^{1, \bar{t}-t+1} \frac{\psi_{jid}^{t, \bar{t}, \bar{t}-t+1}}{\alpha_{jid}^{1, \bar{t}-t+1}} \\ & \psi_{jid}^{t, \bar{t}, \bar{t}-1} \geq \alpha_{jid}^{t, \bar{t}} \pi_{jid}^{t, \bar{t}, \bar{t}-1}(1, 0) + \sum_{d \in [D]} \gamma_{jild}^{t-1, \bar{t}-1} \check{\pi}_{jid}^{t, \bar{t}, \bar{t}-1}(1) + x_{jid}^{1, t-1, \bar{t}-1} \quad \forall l \in [D], \bar{t} \in [t, \bar{S}+1] \\ & \psi_{jid}^{t, \bar{t}, s} \geq \alpha_{jid}^{t-\bar{t}+s+1, s+1} \pi_{jid}^{t, \bar{t}, s} \left( 1, \frac{\psi_{jid}^{t, \bar{t}, s+1}}{\alpha_{jid}^{t-\bar{t}+s+1, s+1}} \right) + \sum_{d \in [D]} \gamma_{jild}^{t-\bar{t}+s, s} \check{\pi}_{jid}^{t, \bar{t}, s}(1) + x_{jid}^{1, t-\bar{t}+s, s} \\ & \quad \forall l \in [D], t \neq 2, \bar{t} \in [t, \bar{S}+1], s \in [\bar{t}-t+1, \bar{t}-2] \end{aligned}$$

$$\sum_{l \in [D]} \sum_{\bar{t} \in [\bar{S}+2, t+\bar{S}-1]} \xi_{jil}^{1, \bar{t}-t+1} \frac{\psi_{jil}^{t, \bar{t}, \bar{t}-t+1}}{\alpha_{jil}^{1, \bar{t}-t+1}}$$

$$\psi_{jil}^{t, \bar{t}, \bar{S}} \geq \alpha_{jil}^{t-\bar{t}+\bar{S}+1, \bar{S}+1} \pi_{jil}^{t, \bar{t}, \bar{S}}(1, 0) + \sum_{d \in [D]} \gamma_{jild}^{t-\bar{t}+\bar{S}, \bar{S}} \check{\pi}_{jil}^{t, \bar{t}, \bar{S}}(1) + x_{jil}^{1, t-\bar{t}+\bar{S}, \bar{S}} \quad \forall l \in [D], \bar{t} \in [\bar{S}+2, t+\bar{S}-1]$$

$$\psi_{jil}^{t, \bar{t}, s} \geq \alpha_{jil}^{t-\bar{t}+s+1, s+1} \pi_{jil}^{t, \bar{t}, s} \left( 1, \frac{\psi_{jil}^{t, \bar{t}, s+1}}{\alpha_{jil}^{t-\bar{t}+s+1, s+1}} \right) + \sum_{d \in [D]} \gamma_{jild}^{t-\bar{t}+s, s} \check{\pi}_{jil}^{t, \bar{t}, s}(1) + x_{jil}^{1, t-\bar{t}+s, s}$$

$$\forall l \in [D], t \neq 2, \bar{t} \in [\bar{S}+2, t+\bar{S}-2], s \in [\bar{t}-t+1, \bar{S}-1]$$

where  $\pi_{jil}^{t, \bar{t}, s}(x, z) = \theta \log \left( 1 + \sum_{\bar{s} \in [0, \bar{t}-s-1]} q_l^s \check{h}_{jil}^{t-\bar{t}+s+\bar{s}, \bar{s}} \left( \exp\left(\frac{x}{\theta}\right) - 1 \right) + (1 - q_l^s - a_l^s) \left( \exp\left(\frac{z}{\theta}\right) - 1 \right) \right)$ ,  
and  $\check{\pi}_{jil}^{t, \bar{t}, s}(x) = \theta \log \left( 1 + \sum_{\bar{\tau} \in [0, \bar{t}-s-1]} \sum_{\tau \in [0, \bar{t}-s-\bar{\tau}-1]} \check{q}_l^{t-\bar{t}+s+\bar{\tau}, \bar{\tau}, s} \check{h}_{jil}^{t-\bar{t}+s+\bar{\tau}+\tau, \tau} \left( \exp\left(\frac{x}{\theta}\right) - 1 \right) \right)$ .

Finally, we consider the reformulation of the fourth line in Equation (14), which also includes four terms. The first, second, and third terms are reformulated as below:

$$\sum_{l \in [D]} \sum_{\bar{t} \in [t-1]} \mathbb{G}_\theta \left( \check{\xi}_{iil}^{t-\bar{t}, 0} \frac{\nu_{il}^{t, \bar{t}, 0}}{\alpha_{iil}^{t-\bar{t}, 0}} \right)$$

$$\nu_{il}^{t, \bar{t}, \bar{t}-1} \geq \alpha_{iil}^{t, \bar{t}} \eta_{il}^{t, \bar{t}, \bar{t}-1}(-1, 0) + \sum_{d \in [D]} \gamma_{iild}^{t-1, \bar{t}-1} \check{\eta}_{il}^{t, \bar{t}, \bar{t}-1}(-1) \quad \forall l \in [D], \bar{t} \in [t-1]$$

$$\nu_{il}^{t, \bar{t}, s} \geq \alpha_{iil}^{t-\bar{t}+s+1, s+1} \eta_{il}^{t, \bar{t}, s} \left( -1, \frac{\nu_{il}^{t, \bar{t}, s+1}}{\alpha_{iil}^{t-\bar{t}+s+1, s+1}} \right) + \sum_{d \in [D]} \gamma_{iild}^{t-\bar{t}+s, s} \check{\eta}_{il}^{t, \bar{t}, s}(-1) \quad \forall l \in [D], t \neq 2, \bar{t} \in [2, t-1], s \in [0, \bar{t}-2]$$

$$\sum_{l \in [D]} \sum_{\bar{t} \in [t, \bar{S}+1]} \xi_{iil}^{1, \bar{t}-t+1} \frac{\nu_{il}^{t, \bar{t}, \bar{t}-t+1}}{\alpha_{iil}^{1, \bar{t}-t+1}} = \sum_{l \in [D]} \sum_{\bar{t} \in [t, \bar{S}+1]} \nu_{il}^{t, \bar{t}, \bar{t}-t+1}$$

$$\nu_{il}^{t, \bar{t}, \bar{t}-1} \geq \alpha_{iil}^{t, \bar{t}} \eta_{il}^{t, \bar{t}, \bar{t}-1}(-1, 0) + \sum_{d \in [D]} \gamma_{iild}^{t-1, \bar{t}-1} \check{\eta}_{il}^{t, \bar{t}, \bar{t}-1}(-1) \quad \forall l \in [D], \bar{t} \in [t, \bar{S}+1]$$

$$\nu_{il}^{t, \bar{t}, s} \geq \alpha_{iil}^{t-\bar{t}+s+1, s+1} \eta_{il}^{t, \bar{t}, s} \left( -1, \frac{\nu_{il}^{t, \bar{t}, s+1}}{\alpha_{iil}^{t-\bar{t}+s+1, s+1}} \right) + \sum_{d \in [D]} \gamma_{iild}^{t-\bar{t}+s, s} \check{\eta}_{il}^{t, \bar{t}, s}(-1)$$

$$\forall l \in [D], t \neq 2, \bar{t} \in [t, \bar{S}+1], s \in [\bar{t}-t+1, \bar{t}-2]$$

$$\sum_{l \in [D]} \sum_{\bar{t} \in [\bar{S}+2, t+\bar{S}-1]} \xi_{iil}^{1, \bar{t}-t+1} \frac{\nu_{il}^{t, \bar{t}, \bar{t}-t+1}}{\alpha_{iil}^{1, \bar{t}-t+1}} = \sum_{l \in [D]} \sum_{\bar{t} \in [\bar{S}+2, t+\bar{S}-1]} \nu_{il}^{t, \bar{t}, \bar{t}-t+1}$$

$$\nu_{il}^{t, \bar{t}, \bar{S}} \geq \alpha_{iil}^{t-\bar{t}+\bar{S}+1, \bar{S}+1} \eta_{il}^{t, \bar{t}, \bar{S}}(-1, 0) + \sum_{d \in [D]} \gamma_{iild}^{t-\bar{t}+\bar{S}, \bar{S}} \check{\eta}_{il}^{t, \bar{t}, \bar{S}}(-1) \quad \forall l \in [D], \bar{t} \in [\bar{S}+2, t+\bar{S}-1]$$

$$\nu_{il}^{t, \bar{t}, s} \geq \alpha_{iil}^{t-\bar{t}+s+1, s+1} \eta_{il}^{t, \bar{t}, s} \left( -1, \frac{\nu_{il}^{t, \bar{t}, s+1}}{\alpha_{iil}^{t-\bar{t}+s+1, s+1}} \right) + \sum_{d \in [D]} \gamma_{iild}^{t-\bar{t}+s, s} \check{\eta}_{il}^{t, \bar{t}, s}(-1)$$

$$\forall l \in [D], t \neq 2, \bar{t} \in [\bar{S}+2, t+\bar{S}-2], s \in [\bar{t}-t+1, \bar{S}-1]$$

The fourth term is reformulated as  $\sum_{d, l \in [D]} \sum_{s \in [0, \bar{S}]} \sum_{\bar{t} \in [\bar{S}]} \xi_{iild}^{1, \bar{t}}(l, s) \hat{\Upsilon}_{il}^{t, \bar{t}, s}(-1)$ . where

$$\eta_{il}^{t, \bar{t}, s}(x, y) = \theta \log \left( 1 + q_l^s \left( 1 - \sum_{\bar{s} \in [0, \bar{t}-s-1]} \check{h}_{iil}^{t-\bar{t}+s+\bar{s}, \bar{s}} \right) \left( \exp\left(\frac{x}{\theta}\right) - 1 \right) + (1 - q_l^s - a_l^s) \left( \exp\left(\frac{y}{\theta}\right) - 1 \right) \right)$$

$$\begin{aligned}\check{\eta}_{il}^{t,\bar{t},s}(x) &= \theta \log \left( 1 + \sum_{\bar{\tau} \in [0, \bar{t}-s-1]} \check{q}_l^{t-\bar{t}+s+\bar{\tau}, \bar{\tau}, s} \left( 1 - \sum_{\tau \in [0, \bar{t}-s-\bar{\tau}-1]} \check{h}_{iil}^{t-\bar{t}+s+\bar{\tau}+\tau, \tau} \right) \left( \exp \left( \frac{x}{\theta} \right) - 1 \right) \right) \\ \hat{\Upsilon}_{il}^{t,\bar{t},s}(x) &= \theta \log \left( 1 + \sum_{\bar{\tau} \in [(S-\bar{t}+1) \wedge (t-1)]} \check{q}_l^{\bar{\tau}, \bar{t}+\bar{\tau}-1, s} \left( 1 - \sum_{\tau \in [0, \bar{t}-\bar{\tau}-1]} \check{h}_{iil}^{\bar{\tau}+\tau, \tau} \right) \left( \exp \left( \frac{x}{\theta} \right) - 1 \right) \right)\end{aligned}$$

Combining the above results, we have the reformulation of Equation (14).

For Constraint (7b), when  $t = 1$ , for  $i \in [I]$  and  $d \in [D]$ , the left-hand side of equation is

$$\left\{ \begin{aligned} & \sum_{j \in [I]} \sum_{l \in [D]} \left( \mathbb{G}_\theta \left[ \frac{\check{\zeta}_{ijl}^{1,0} \bar{\phi}_{ijld}^{1,1,0}}{\alpha_{ijl}^{1,0}} \right] + \sum_{\bar{t} \in [2, 1+\bar{S}]} \bar{\phi}_{ijld}^{1,\bar{t},\bar{t}-1} + \sum_{s \in [0, \bar{S}]} \sum_{\bar{t} \in [\bar{S}]} \zeta_{ijd}^{1,\bar{t}}(l, s) \Upsilon_l^{2,\bar{t},s}(1) \right) + \sum_{j \in [I]} x_{ijd}^{0,1} - z_{id}^1 \\ & \bar{\phi}_{ijdd}^{1,\bar{t},s} \geq \alpha_{ijd}^{1-\bar{t}+s+2, s+1} \rho_d^s(1, 0) + \gamma_{ijdd}^{1-\bar{t}+s+1, s} \check{\rho}_d^{2,\bar{t},s}(1) + x_{ijd}^{1, 1-\bar{t}+s+1, s} \\ & \quad \forall j \in [I], \bar{t} \in [1+\bar{S}], s = \min\{\bar{t}-1, \bar{S}\} \\ & \bar{\phi}_{ijld}^{1,\bar{t},s} \geq \gamma_{ijld}^{1-\bar{t}+s+1, s} \check{\rho}_l^{2,\bar{t},s}(1) \quad \forall j \in [I], \bar{t} \in [1+\bar{S}], l \in [D] \setminus \{d\}, s = \min\{\bar{t}-1, \bar{S}\} \end{aligned} \right. \quad (17)$$

Secondly, considering  $t \geq 2$ , for any  $i \in [I]$  and  $d \in [D]$ , we have:

$$\mathbb{G}_\theta \left( \sum_{j \in [I]} \left( \sum_{l \in [D]} \sum_{s \in [0, \bar{S}]} \tilde{y}_{ijd}^{t,0}(\tilde{\zeta}, l, s) + \tilde{y}_{ijd}^{t,0}(\tilde{\xi}) + \tilde{x}_{ijd}^t \right) - \tilde{z}_{id}^t \right) = -z_{id}^1 + \text{Four terms} \quad (18)$$

The four terms can be formulated as

$$\begin{aligned} & \sum_{l \in [D]} \sum_{\bar{t} \in [t]} \mathbb{G}_\theta \left[ \frac{\check{\zeta}_{ijl}^{t-\bar{t}+1, 0} \bar{\phi}_{ijld}^{t,\bar{t},0}}{\alpha_{ijl}^{t-\bar{t}+1, 0}} \right] + \sum_{l \in [D]} \sum_{\bar{t} \in [t+1, t+\bar{S}]} \bar{\phi}_{ijld}^{t,\bar{t},\bar{t}-t} + \sum_{l \in [D]} \sum_{s \in [0, \bar{S}]} \sum_{\bar{t} \in [\bar{S}]} \zeta_{ijd}^{1,\bar{t}}(l, s) \Upsilon_l^{t+1,\bar{t},s}(1) \\ & \bar{\phi}_{ijdd}^{t,\bar{t},s} \geq \alpha_{ijd}^{t-\bar{t}+s+2, s+1} \rho_d^s(1, 0) + \gamma_{ijdd}^{t-\bar{t}+s+1, s} \check{\rho}_d^{t+1,\bar{t},s}(1) + x_{ijd}^{1, t-\bar{t}+s+1, s}, \quad \forall j \in [I] \setminus \{i\}, \bar{t} \in [t+\bar{S}], s = \min\{\bar{t}-1, \bar{S}\} \\ & \bar{\phi}_{ijld}^{t,\bar{t},s} \geq \gamma_{ijld}^{t-\bar{t}+s+1, s} \check{\rho}_l^{t+1,\bar{t},s}(1) \quad \forall j \in [I] \setminus \{i\}, \bar{t} \in [t+\bar{S}], l \in [D] \setminus \{d\}, s = \min\{\bar{t}-1, \bar{S}\} \\ & \bar{\phi}_{ijdd}^{t,\bar{t},s} \geq \alpha_{ijd}^{t-\bar{t}+s+2, s+1} \rho_d^s \left( 1, \frac{\bar{\phi}_{ijdd}^{t,\bar{t},s+1}}{\alpha_{ijd}^{t-\bar{t}+s+2, s+1}} \right) + \gamma_{ijdd}^{t-\bar{t}+s+1, s} \check{\rho}_d^{t+1,\bar{t},s}(1) + x_{ijd}^{1, t-\bar{t}+s+1, s} \\ & \quad \forall j \in [I] \setminus \{i\}, s \in [0, \bar{S}-1], \bar{t} \in [s+2, s+t] \\ & \bar{\phi}_{ijld}^{t,\bar{t},s} \geq \alpha_{ijl}^{t-\bar{t}+s+2, s+1} \rho_l^s \left( 0, \frac{\bar{\phi}_{ijld}^{t,\bar{t},s+1}}{\alpha_{ijl}^{t-\bar{t}+s+2, s+1}} \right) + \gamma_{ijld}^{t-\bar{t}+s+1, s} \check{\rho}_l^{t+1,\bar{t},s}(1) \quad \forall j \in [I] \setminus \{i\}, s \in [0, \bar{S}-1], l \in [D] \setminus \{d\}, \bar{t} \in [s+2, s+t] \\ & \sum_{l \in [D]} \sum_{\bar{t} \in [t-1]} \mathbb{G}_\theta \left[ \frac{\check{\zeta}_{jil}^{t-\bar{t}, 0} \bar{\psi}_{jild}^{t,\bar{t},0}}{\alpha_{jil}^{t-\bar{t}, 0}} \right] + \sum_{l \in [D]} \sum_{\bar{t} \in [t, t+\bar{S}-1]} \bar{\psi}_{jild}^{t,\bar{t},\bar{t}-t+1} + \sum_{l \in [D]} \sum_{s \in [0, \bar{S}]} \sum_{\bar{t} \in [\bar{S}]} \zeta_{jil}^{1,\bar{t}}(l, s) \bar{\Upsilon}_{jil}^{t,\bar{t},s}(-1) \\ & \bar{\psi}_{jidd}^{t,\bar{t},s} \geq \alpha_{jil}^{t-\bar{t}+s+1, s+1} \pi_{jil}^{t,\bar{t},s}(-1, 0) + \gamma_{jidd}^{t-\bar{t}+s, s} \check{\pi}_{jil}^{t,\bar{t},s}(-1) - x_{jil}^{1, t-\bar{t}+s, s} \quad \forall j \in [I] \setminus \{i\}, \bar{t} \in [t+\bar{S}-1], s = \min\{\bar{t}-1, \bar{S}\} \\ & \bar{\psi}_{jild}^{t,\bar{t},s} \geq \gamma_{jild}^{t-\bar{t}+s, s} \check{\pi}_{jil}^{t,\bar{t},s}(-1) \quad \forall j \in [I] \setminus \{i\}, l \in [D] \setminus \{d\}, \bar{t} \in [t+\bar{S}-1], s = \min\{\bar{t}-1, \bar{S}\} \\ & \bar{\psi}_{jidd}^{t,\bar{t},s} \geq \alpha_{jil}^{t-\bar{t}+s+1, s+1} \pi_{jil}^{t,\bar{t},s} \left( -1, \frac{\bar{\psi}_{jidd}^{t,\bar{t},s+1}}{\alpha_{jil}^{t-\bar{t}+s+1, s+1}} \right) + \gamma_{jidd}^{t-\bar{t}+s, s} \check{\pi}_{jil}^{t,\bar{t},s}(-1) - x_{jil}^{1, t-\bar{t}+s, s} \\ & \quad \forall j \in [I] \setminus \{i\}, s \in [0, \bar{S}-1], t \neq 2, \bar{t} \in [s+2, s+t-1] \\ & \bar{\psi}_{jild}^{t,\bar{t},s} \geq \alpha_{jil}^{t-\bar{t}+s+1, s+1} \pi_{jil}^{t,\bar{t},s} \left( 0, \frac{\bar{\psi}_{jild}^{t,\bar{t},s+1}}{\alpha_{jil}^{t-\bar{t}+s+1, s+1}} \right) + \gamma_{jild}^{t-\bar{t}+s, s} \check{\pi}_{jil}^{t,\bar{t},s}(-1)\end{aligned}$$

$$\begin{aligned}
& \forall j \in [I] \setminus \{i\}, s \in [0, \bar{S} - 1], t \neq 2, l \in [D] \setminus \{d\}, \bar{t} \in [s + 2, s + t - 1] \\
& \sum_{l \in [D]} \sum_{\bar{t} \in [t]} \mathbb{G}_\theta \left[ \tilde{\xi}_{iil}^{t-\bar{t}+1,0} \frac{\bar{v}_{ild}^{t,\bar{t},0}}{\alpha_{iil}^{t-\bar{t}+1,0}} \right] + \sum_{l \in [D]} \sum_{\bar{t} \in [t+1, t+\bar{S}]} \bar{v}_{ild}^{t,\bar{t},\bar{t}-t} + \sum_{l \in [D]} \sum_{s \in [0, \bar{S}]} \sum_{\bar{t} \in [\bar{S}]} \zeta_{iil}^{1,\bar{t}}(l, s) \check{Y}_{il}^{t,\bar{t},s}(1) \\
& \bar{v}_{ild}^{t,\bar{t},s} \geq \alpha_{iil}^{t-\bar{t}+s+2, s+1} \rho_d^s(1, 0) + \gamma_{iild}^{t-\bar{t}+s+1, s} \check{\rho}_d^{t+1, \bar{t}, s}(1) \quad \forall \bar{t} \in [t + \bar{S}], s = \min\{\bar{t} - 1, \bar{S}\} \\
& \bar{v}_{ild}^{t,\bar{t},s} \geq \gamma_{iild}^{t-\bar{t}+s+1, s} \check{\rho}_l^{t+1, \bar{t}, s}(1) \quad \forall l \in [D] \setminus \{d\}, \bar{t} \in [t + \bar{S}], s = \min\{\bar{t} - 1, \bar{S}\} \\
& \bar{v}_{ild}^{t,\bar{t},s} \geq \alpha_{iil}^{t-\bar{t}+s+2, s+1} \bar{\eta}_{id}^{t,\bar{t},s} \left( 1, \frac{\bar{v}_{idd}^{t,\bar{t},s+1}}{\alpha_{iil}^{t-\bar{t}+s+2, s+1}} \right) + \gamma_{iild}^{t-\bar{t}+s+1, s} \check{\eta}_{id}^{t,\bar{t},s}(1), \quad \forall s \in [0, \bar{S} - 1], \bar{t} \in [s + 2, s + t] \\
& \bar{v}_{ild}^{t,\bar{t},s} \geq \alpha_{iil}^{t-\bar{t}+s+2, s+1} \bar{\eta}_{il}^{t,\bar{t},s} \left( 0, \frac{\bar{v}_{ild}^{t,\bar{t},s+1}}{\alpha_{iil}^{t-\bar{t}+s+2, s+1}} \right) + \gamma_{iild}^{t-\bar{t}+s+1, s} \check{\eta}_{il}^{t,\bar{t},s}(1), \quad \forall s \in [0, \bar{S} - 1] \quad l \in [D] \setminus \{d\}, \bar{t} \in [s + 2, s + t]
\end{aligned}$$

and  $\sum_{l \in [D]} \sum_{j \in [I]} \sum_{s \in [0, \bar{S}]} \sum_{\bar{t} \in [S]} y_{jid}^{1, \bar{t}}(\check{\zeta}, l, s) \check{Y}_{jil}^{t, \bar{t}}(-1) + \sum_{j \in [I]} \sum_{\bar{t} \in [S]} y_{jid}^{1, \bar{t}}(\check{\xi}) \check{Y}_{jid}^{t, \bar{t}}(-1)$ , where

$$\begin{aligned}
\bar{\eta}_{il}^{t,\bar{t},s}(x, y) &= \theta \log \left( 1 + q_l^s \left( 1 - \sum_{\bar{s} \in [0, \bar{t}-s-2]} \check{h}_{iil}^{t+1-\bar{t}+s+\bar{s}} \right) \left( \exp\left(\frac{x}{\theta}\right) - 1 \right) + (1 - q_l^s - a_l^s) \left( \exp\left(\frac{y}{\theta}\right) - 1 \right) \right) \\
\check{\eta}_{il}^{t,\bar{t},s}(x) &= \theta \log \left( 1 + \sum_{\bar{\tau} \in [0, \bar{t}-s-1]} \check{q}_l^{t+1-\bar{t}+s+\bar{\tau}} \left( 1 - \sum_{\tau \in [0, \bar{t}-s-\bar{\tau}-2]} \check{h}_{iil}^{t+1-\bar{t}+s+\bar{\tau}+\tau} \right) \left( \exp\left(\frac{x}{\theta}\right) - 1 \right) \right) \\
\check{Y}_{il}^{t,\bar{t},s}(x) &= \theta \log \left( 1 + \sum_{\bar{\tau} \in [(\bar{S}-\bar{t}+1) \wedge (t)]} \check{q}_l^{\bar{\tau}, \bar{t}+\bar{\tau}-1, s} \left( 1 - \sum_{\tau \in [0, t-\bar{\tau}-1]} \check{h}_{iil}^{\bar{\tau}+\tau, \tau} \right) \left( \exp\left(\frac{x}{\theta}\right) - 1 \right) \right)
\end{aligned}$$

□

*Proof of Proposition 4* Constraint  $\mathbb{G}_\theta(\bar{R} - \tilde{R}) \leq 0$  is equivalent to  $\mathbb{G}_\theta(-\tilde{R}) \leq \bar{R}$ . The reformulation of  $\mathbb{G}_\theta(-\tilde{R})$  follows the proof of Proposition 3 and is thus omitted here, and is shown below:

$$\begin{aligned}
& \sum_{i, j \in [I]} \sum_{l \in [D]} \left( \sum_{t \in [T]} \mathbb{G}_\theta \left[ \tilde{\xi}_{ijl}^{T-t+1,0} \frac{\hat{\psi}_{ijl}^{t,0}}{\alpha_{ijl}^{T-t+1,0}} \right] + \sum_{t \in [T+1, T+\bar{S}]} \hat{\psi}_{ijl}^{t, t-T} + \sum_{d \in [D]} \sum_{s \in [0, \bar{S}]} \sum_{t \in [\bar{S}]} \zeta_{ijl}^{1,t}(l, s) \dot{Y}_{ijld}^{T+1, t, s} \right) \\
& + \sum_{i, j \in [I]} \sum_{t \in [T]} \sum_{d \in [D]} c_{ijd} x_{ijld}^{0, t} + \sum_{d, l \in [D]} \sum_{i, j \in [I]} \sum_{s \in [0, \bar{S}]} \sum_{t \in [S]} y_{ijld}^{1, t}(\check{\zeta}, l, s) \dot{Y}_{ijld}^{T+1, t, s} + \sum_{d \in [D]} \sum_{i, j \in [I]} \sum_{t \in [S]} y_{ijld}^{1, t}(\check{\xi}) \dot{Y}_{ijld}^{T+1, t} \\
& \hat{\psi}_{ijl}^{t, s} \geq \alpha_{ijl}^{T-t+s+2, s+1} \bar{\pi}_{ijl}^{T+1, t, s}(0) + \sum_{d \in [D]} \gamma_{ijld}^{T-t+s+1, s} \bar{\pi}_{ijld}^{T+1, t, s} + c_{ijl} x_{ijl}^{1, T-t+s+1, s} \\
& \quad \forall i, j \in [I], l \in [D], t \in [T + \bar{S}], s = \min\{t - 1, \bar{S}\} \\
& \hat{\psi}_{ijl}^{t, s} \geq \alpha_{ijl}^{T-t+s+2, s+1} \bar{\pi}_{ijl}^{T+1, t, s} \left( \frac{\hat{\psi}_{ijl}^{t, s+1}}{\alpha_{ijl}^{T-t+s+2, s+1}} \right) + \sum_{d \in [D]} \gamma_{ijld}^{T-t+s+1, s} \bar{\pi}_{ijld}^{T+1, t, s} + c_{ijl} x_{ijl}^{1, T-t+s+1, s} \\
& \quad \forall i, j \in [I], l \in [D], s \in [0, \bar{S} - 1], t \in [s + 2, s + T]
\end{aligned}$$

where

$$\bar{\pi}_{ijl}^{T+1, t, s}(z) = \theta \log \left( 1 + \sum_{\bar{s} \in [0, t-s-1]} q_l^{\bar{s}} \check{h}_{ijl}^{T+1-t+s+\bar{s}} \left( \exp\left(\frac{-r_{ijl}^{T-t+s+\bar{s}+1, \bar{s}}}{\theta}\right) - 1 \right) + (1 - q_l^s - a_l^s) \left( \exp\left(\frac{z}{\theta}\right) - 1 \right) \right)$$

$$\begin{aligned}
\check{\pi}_{ijld}^{T+1,t,s} &= \theta \log \left( 1 + \sum_{\bar{\tau} \in [0, t-s-1]} \sum_{\tau \in [0, t-s-\bar{\tau}-1]} \check{q}_l^{T+1-t+s+\bar{\tau}, \bar{\tau}, s} \check{h}_{ijl}^{T+1-t+s+\bar{\tau}+\tau, \tau} \left( \exp \left( \frac{-\bar{r}_{ijld}^{T-t+s+\bar{\tau}+\tau+1, s, \tau}}{\theta} \right) - 1 \right) \right) \\
\check{\Upsilon}_{ijld}^{T+1,t,s} &= \theta \log \left( 1 + \sum_{\bar{\tau} \in [(\bar{S}-t+1) \wedge (T)]} \sum_{\tau \in [0, T-\bar{\tau}]} \check{q}_l^{\bar{\tau}, t+\bar{\tau}-1, s} \check{h}_{ijl}^{\bar{\tau}+\tau, \tau} \left( \exp \left( \frac{-\bar{r}_{ijld}^{\bar{\tau}+\tau, s, \tau}}{\theta} \right) - 1 \right) \right) \\
\check{\Upsilon}_{ijld}^{T+1,t,s} &= \theta \log \left( 1 + \sum_{\bar{\tau} \in [(T) \wedge (S-t+1)]} \check{h}_{ijl}^{\bar{\tau}, t+\bar{\tau}-1} \left( \exp \left( \frac{-\bar{r}_{ijld}^{\bar{\tau}, s, t+\bar{\tau}-1}}{\theta} \right) - 1 \right) \right) \\
\check{\Upsilon}_{ijld}^{T+1,t} &= \theta \log \left( 1 + \sum_{\bar{s} \in [(T) \wedge (S-t+1)]} \check{h}_{ijl}^{\bar{s}, t+\bar{s}-1} \left( \exp \left( \frac{-\bar{r}_{ijld}^{\bar{s}, t+\bar{s}-1}}{\theta} \right) - 1 \right) \right).
\end{aligned}$$

□

*Proof of Corollary 1* It is straightforward based on proposition of the entropic measure. □

## B. Extension model with cancellation fee

Our model can be extended to incorporate the cancellation fee, whereby customers are required to pay a certain fee upon canceling their order. This cancellation fee is also counted as part of the rental company's revenue. Let  $\hat{r}_{ijld}^{t,\tau}$  denote the cancellation fee for an order for vehicle type  $d$  on arc  $(i, j)$  that has been placed for  $\tau$  period at time  $t$ , that is canceled without substitution. Similarly, let  $\check{r}_{ijld}^{t,s,\tau}$  be the cancellation fee for an order for vehicle type  $l$  on arc  $(i, j)$  that is substituted with vehicle type  $d$  after waiting  $s$  periods since placement, that continues to wait for  $\tau$  periods at time  $t$  and is subsequently canceled. Accordingly, the cancellation fee can be formulated as follows:

$$\tilde{R}' = \sum_{i,j \in [I]} \sum_{t \in [T]} \sum_{d \in [D]} \left[ \sum_{\bar{\tau} \in [0, \bar{S}]} \left( \hat{r}_{ijld}^{t,\bar{\tau}} \text{Bin} \left( \check{\xi}_{ijl}^{t,\bar{\tau}} \left( 1 - \sum_{l \in [D]} \beta_{ijdl}^{t,\bar{\tau}} \right), a_d^{\bar{\tau}} \right) + \sum_{s \in [0, \bar{S}]} \sum_{l \in [D]} \check{r}_{ijld}^{t,s,\bar{\tau}} \text{Bin} \left( \check{\zeta}_{ijl}^{t,\bar{\tau}}(l, s), a_l^{\bar{\tau}+s} \right) \right) \right] \quad (20)$$

Constraint (20) includes two terms that account for the cancellation fees corresponding to the customers in the waiting lists  $\check{\xi}$  and  $\check{\zeta}$ , respectively. The following proposition shows that Constraint (20) can be reformulated as convex constraints. We omit its proof for brevity.

**PROPOSITION 7.** *Constraint  $\mathbb{G}_\theta \left( \bar{R} - \tilde{R} - \tilde{R}' \right) \leq 0$  can be reformulated as the following set of exponential conic constraints under the non-integral approximation.*

$$\begin{aligned}
& \sum_{i,j \in [I]} \sum_{l \in [D]} \left( \sum_{t \in [T]} \mathbb{G}_\theta \left[ \check{\xi}_{ijl}^{T-t+1,0} \frac{\check{\psi}_{ijl}^{t,0}}{\alpha_{ijl}^{T-t+1,0}} \right] + \sum_{t \in [T+1, T+\bar{S}]} \check{\psi}_{ijl}^{t,t-T} \right) + \sum_{d,l \in [D]} \sum_{i,j \in [I]} \sum_{s \in [0, \bar{S}]} \sum_{t \in [\bar{S}]} \zeta_{ijld}^{1,t}(l, s) \check{\Upsilon}_{ijld}^{T+1,t,s} \\
& + \sum_{i,j \in [I]} \sum_{t \in [T]} \sum_{d \in [D]} c_{ijld} x_{ijld}^{0,t} + \sum_{d,l \in [D]} \sum_{i,j \in [I]} \sum_{s \in [0, \bar{S}]} \sum_{t \in [S]} y_{ijld}^{1,t}(\check{\zeta}, l, s) \check{\Upsilon}_{ijld}^{T+1,t,s} + \sum_{d \in [D]} \sum_{i,j \in [I]} \sum_{t \in [S]} y_{ijld}^{1,t}(\check{\xi}) \check{\Upsilon}_{ijld}^{T+1,t} \leq \bar{R} \\
& \check{\psi}_{ijl}^{t,s} \geq \alpha_{ijl}^{T-t+s+2, s+1} \check{\pi}_{ijl}^{T+1,t,s}(0) + \sum_{d \in [D]} \gamma_{ijld}^{T-t+s+1, s} \check{\pi}_{ijld}^{T+1,t,s} + c_{ijld} x_{ijl}^{1, T-t+s+1, s} \\
& \forall i, j \in [I], l \in [D], t \in [T+\bar{S}], s = \min\{t-1, \bar{S}\}
\end{aligned}$$

$$\check{\psi}_{ijl}^{t,s} \geq \alpha_{ijl}^{T-t+s+2,s+1} \check{\pi}_{ijl}^{T+1,t,s} \left( \frac{\hat{\psi}_{ijl}^{t,s+1}}{\alpha_{ijl}^{T-t+s+2,s+1}} \right) + \sum_{d \in [D]} \gamma_{ijld}^{T-t+s+1,s} \check{\pi}_{ijld}^{T+1,t,s} + c_{ijl} x_{ijl}^{1,T-t+s+1,s}$$

$$\forall i, j \in [I], l \in [D], s \in [0, \bar{S} - 1], t \in [s+2, s+T]$$

where  $\check{\Upsilon}_{ijld}^{T+1,t,s}$ ,  $\check{\Upsilon}_{ijld}^{T+1,s,t}$  and  $\check{\Upsilon}_{ijld}^{T+1,t}$  are defined as in the proof of Proposition 4. Denote  $\check{a}_l^{t,\tau,s} = a_l^{\tau+s} \prod_{\bar{\tau}=1}^{t-1 \wedge \tau} (1 - q_l^{\tau+s-\bar{\tau}} - a_l^{\tau+s-\bar{\tau}})$ , and the other parameter is defined as follows:

$$\begin{aligned} \check{\pi}_{ijl}^{T+1,t,s}(z) &= \theta \log \left[ 1 + \sum_{\bar{s} \in [0, t-s-1]} q_l^{\bar{s}} \check{h}_{ijl}^{T+1-t+s+\bar{s}, \bar{s}} \left( \exp \left( \frac{-r_{ijl}^{T-t+s+\bar{s}+1, \bar{s}}}{\theta} \right) - 1 \right) \right. \\ &\quad \left. + a_l^{\bar{s}} \left( \exp \left( \frac{-\hat{r}_{ijl}^{T-t+s+1, \bar{s}}}{\theta} \right) - 1 \right) + (1 - q_l^{\bar{s}} - a_l^{\bar{s}}) \left( \exp \left( \frac{z}{\theta} \right) - 1 \right) \right] \\ \check{\pi}_{ijld}^{T+1,t,s} &= \theta \log \left[ 1 + \sum_{\bar{\tau} \in [0, t-s-1]} \sum_{\tau \in [0, t-s-\bar{\tau}-1]} \check{q}_l^{T+1-t+s+\bar{\tau}, \bar{\tau}, s} \check{h}_{ijld}^{T+1-t+s+\bar{\tau}+\tau, \tau} \left( \exp \left( \frac{-\check{r}_{ijld}^{T-t+s+\bar{\tau}+\tau+1, s, \tau}}{\theta} \right) - 1 \right) \right. \\ &\quad \left. + \sum_{\bar{\tau} \in [0, t-s-1]} \check{a}_l^{T+1-t+s+\bar{\tau}, \bar{\tau}, s} \left( \exp \left( \frac{-\check{r}_{ijld}^{T+1-t+s+\bar{\tau}, \bar{\tau}}}{\theta} \right) - 1 \right) \right] \\ \check{\Upsilon}_{ijld}^{T+1,t,s} &= \theta \log \left[ 1 + \sum_{\bar{\tau} \in [(S-t+1) \wedge (T)]} \sum_{\tau \in [0, T-\bar{\tau}]} \check{q}_l^{\bar{\tau}, t+\bar{\tau}-1, s} \check{h}_{ijld}^{\bar{\tau}+\tau, \tau} \left( \exp \left( \frac{-\check{r}_{ijld}^{\bar{\tau}+\tau, s, \tau}}{\theta} \right) - 1 \right) \right. \\ &\quad \left. + \sum_{\bar{\tau} \in [(T) \wedge (S-t+1)]} \check{a}_{ijl}^{\bar{\tau}, t+\bar{\tau}-1, s} \left( \exp \left( \frac{-\check{r}_{ijld}^{\bar{\tau}, s, t+\bar{\tau}-1}}{\theta} \right) - 1 \right) \right] \end{aligned}$$

### C. SAA model

The dynamics of the SAA model for every sample  $e \in E$  is formulated as follows:

$$\xi_{ijd}^{t,0,e} = \hat{\lambda}_{ijd}^{t,e}, \quad (22a)$$

$$\xi_{ijd}^{t,s,e} = \xi_{ijd}^{t-1,s-1,e} \left( 1 - \sum_{l \in [D]} \beta_{ijdl}^{t-1,s-1} \right) (1 - q_d^{s-1} - a_d^{s-1}) \quad \forall s \in [\bar{S}], \quad (22b)$$

$$\zeta_{ijd}^{t,0,e}(l, s) = \beta_{ijld}^{t,s} \xi_{ijl}^{t,s,e}, \quad \forall l \in [D], s \in [0, \bar{S}], \quad (22c)$$

$$y_{ijd}^{t,e}(\xi) = \sum_{s=0}^{t-1} \xi_{ijd}^{t-s,0,e} q_d^s + \sum_{s=t}^{\bar{S}} \xi_{ijd}^{1,s-t+1} q_d^s, \quad (22d)$$

$$y_{ijd}^{t,e}(\zeta, l, s) = \sum_{s=0}^{t-1} \zeta_{ijd}^{t-s,0,e}(l, s) q_l^s + \sum_{s=t}^{\bar{S}} \zeta_{ijd}^{1,s-t+1}(l, s) q_l^s, \quad \forall l \in [D], s \in [0, \bar{S}], \quad (22e)$$

$$x_{ijd}^{t,e} = \sum_{s \in [0, \bar{S}]} \frac{x_{ijd}^{1,t,s}}{\alpha_{ijd}^{t,s}} \xi_{ijd}^{t,s,e} + x_{ijd}^{0,t}. \quad (22f)$$

Compared with our model, SAA model (22) cannot capture the dynamics of the vehicle rental system via distributional laws, and thus employs sample realizations. For every sample  $e \in E$  and every  $i \in [I], d \in [D]$ , the inventory  $z_{id}^{t,e}$  and associated SAA model can be formulated as below:

$$\max_{\alpha, \gamma, \mathbf{x} \geq 0} R = \sum_{i,j \in [I]} \sum_{t \in [T]} \sum_{d \in [D]} \sum_{e \in [E]} \frac{1}{E} \left( \sum_{\tau=1}^{t-1} y_{ijd}^{t-\tau,e}(\xi) h_{ijd}^{\tau} r_{ijd}^{t,\tau} + \sum_{\tau=t}^S y_{ijd}^{1,\tau-t+1}(\xi) h_{ijd}^{\tau} r_{ijd}^{t,\tau} \right)$$

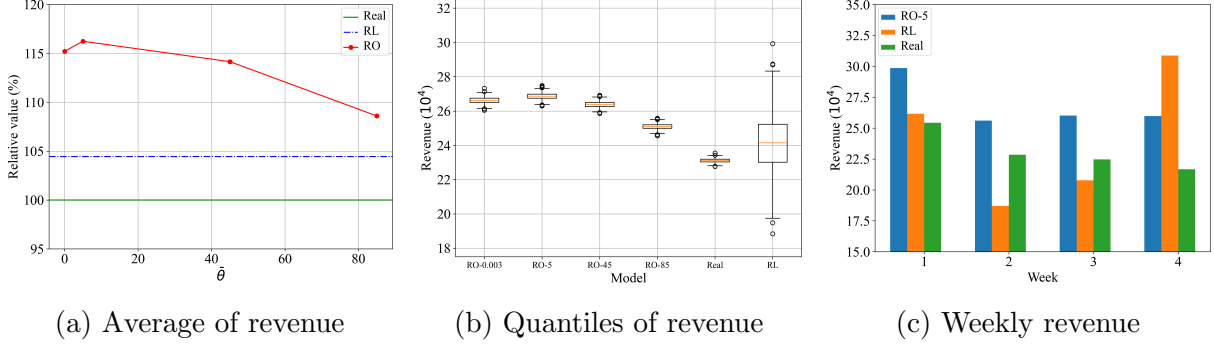
**Figure 10** Out-of-sample revenue comparison of the  $RO-\bar{\theta}$ , Real decision and RL algorithm

$$\begin{aligned}
 & + \sum_{s \in [0, \bar{S}]} \sum_{l \in [D]} \left( \sum_{\tau=1}^{t-1} y_{ijd}^{t-\tau, e}(\zeta, l, s) h_{ijl}^{\tau} \bar{r}_{ijld}^{t, s, \tau} + \sum_{\tau=t}^S y_{ijd}^{1, \tau-t+1}(\zeta, l, s) h_{ijl}^{\tau} \bar{r}_{ijld}^{t, s, \tau} \right) - \sum_{i, j \in [I]} \sum_{d \in [D]} \sum_{t \in [T]} \sum_{e \in [E]} \frac{1}{E} c_{ijd} x_{ijd}^{t, e} \\
 \text{s.t. } & z_{id}^{t, e} = z_{id}^{t-1, e} - \sum_{j \in [I]} \left( y_{jid}^{t-1, e}(\xi) + \sum_{s \in [0, \bar{S}]} \sum_{l \in [D]} y_{ijd}^{t-1, e}(\zeta, l, s) \right) - \sum_{j \in [I]} x_{ijd}^{t-1, e} + \sum_{j \in [I]} x_{jid}^{t-1, e} \\
 & + \sum_{j \in [I]} \left( \sum_{\tau=1}^{t-1} y_{jid}^{t-\tau, e}(\xi) h_{jid}^{\tau} + \sum_{\tau=t}^S y_{jid}^{1, \tau-t+1}(\xi) h_{jid}^{\tau} + \sum_{s \in [0, \bar{S}]} \sum_{l \in [D]} \left( \sum_{\tau=1}^{t-1} y_{jid}^{t-\tau, e}(\zeta, l, s) h_{jil}^{\tau} + \sum_{\tau=t}^S y_{jid}^{1, \tau-t+1}(\zeta, l, s) h_{jil}^{\tau} \right) \right) \\
 & \sum_{d \in [D]} z_{id}^{t, e} \leq B_i, \quad \forall i \in [I], t \in [2, T], e \in [E] \\
 & \sum_{j \in [I]} \left( \sum_{l \in [D]} \sum_{s \in [0, \bar{S}]} y_{ijd}^{t, e}(\zeta, l, s) + y_{ijd}^{t, e}(\xi) \right) + \sum_{j \in [I]} x_{ijd}^{t, e} \leq z_{id}^{t, e}, \quad \forall i \in [I], d \in [D], t \in [T], e \in [E] \\
 & \sum_{d \in [D]} \gamma_{ijld}^{t, s} \leq \alpha_{ijl}^{t, s}, \quad \forall i, j \in [I], l \in [D], t \in [T], s \in [0, \bar{S}]
 \end{aligned}$$

## D. Revenue comparison with benchmarks in practice

To assess practical effectiveness, we benchmark our model against real company decisions (Real) and a reinforcement learning (RL) baseline. For the real policy, we aggregate operational data to compute substitution proportions and repositioning volumes across stores and vehicle types. For RL, we implement a Proximal Policy Optimization (PPO) agent with a Multi-Layer policy (MLP) with learning rate  $3 \times 10^{-4}$ , batch size 32, 10 epochs per update,  $\gamma = 1.0$ , and rollout length 512, trained for 50,000 steps to ensure convergence. Figure 10(a) shows that  $RO-\bar{\theta}$  models consistently outperform both baselines under 1000 experiments using real data, especially improving revenues by 5–15% over real decisions. Figures 10(b) and 10(c) further display that the RL policy yields greater variability and unstable weekly performance. By contrast,  $RO-\bar{\theta}$  models achieve higher medians with lower variance, and we see the RO-5 model dominates across four weeks.
